# Supplementary material
Source: PubMed Central journal article supplement (PMC8729831)

## **Supplemental Materials.**

### **Page 2-3. Supplemental Table 1.**

Estimated dialysis reimbursement data and healthcare expenditure data.

### **Page 4. Supplemental Figure 1. Dialysis Costs and Healthcare Expenditures**

Linear regression of dialysis costs and healthcare expenditures including all nations with available data. The Pearson correlation coefficient ( $r$ ) = 0.92 (95% CI 0.87-0.95,  $p < 0.001$ ). Predicted annual cost in US, based on the regression model is \$101,385 (95% prediction interval: \$82,490-\$120,279).

### **Page 5. Supplemental Figure 2. Dialysis Costs and Healthcare Expenditures among Wealthier Nations, Stratified by Payer System**

Linear regression of dialysis costs and healthcare expenditures of 22 countries with healthcare expenditures per capita more than \$2000, stratified by single-payer versus multiple-payer dominant status, as well as the United States. Among single payer dominant nations, the Pearson correlation coefficient ( $r$ ) = 0.86 (95% CI: 0.56-0.96,  $p < 0.001$ ). Among multiple-payer dominant nations, Pearson  $r$  = 0.57 (95% CI: 0.08-0.86,  $p = 0.08$ ).

**Supplemental Table 1.** Estimated dialysis reimbursement data and healthcare expenditure data among 80 countries. The nine countries with missing expenditure data do not have information available on World Health Organization Global Expenditure Database and were not included in analyses.

| <b>Country</b>    | <b>Estimated Annual Dialysis Cost per Patient per Year (US \$)</b> | <b>Annual Healthcare Expenditures per GDP per Capita (US \$)</b> |
|-------------------|--------------------------------------------------------------------|------------------------------------------------------------------|
| <b>Albania</b>    | 15,081                                                             | -                                                                |
| <b>Algeria</b>    | 9,152                                                              | 258.49                                                           |
| <b>Argentina</b>  | 15,600                                                             | 1,324.60                                                         |
| <b>Aruba</b>      | 75,660                                                             | -                                                                |
| <b>Australia</b>  | 56,746                                                             | 5,331.82                                                         |
| <b>Austria</b>    | 55,062                                                             | 4,939.88                                                         |
| <b>Bangladesh</b> | 3,900                                                              | 36.28                                                            |
| <b>Belarus</b>    | 5,070                                                              | 342.50                                                           |
| <b>Belgium</b>    | 64,531                                                             | 4,507.36                                                         |
| <b>Bolivia</b>    | 18,720                                                             | 220.27                                                           |
| <b>Bosnia-H.</b>  | 17,536                                                             | 460.47                                                           |
| <b>Brazil</b>     | 8,700                                                              | 928.80                                                           |
| <b>Bulgaria</b>   | 13,152                                                             | 663.72                                                           |
| <b>Burundi</b>    | 12,480                                                             | 23.50                                                            |
| <b>Cameroon</b>   | 1,560                                                              | 67.81                                                            |
| <b>Canada</b>     | 38,136                                                             | 4,754.95                                                         |
| <b>Chile</b>      | 13,166                                                             | 1,381.99                                                         |
| <b>Colombia</b>   | 9,079                                                              | 459.20                                                           |
| <b>Costa Rica</b> | 93,600                                                             | 869.08                                                           |
| <b>Croatia</b>    | 21,690                                                             | 902.14                                                           |
| <b>Curacao</b>    | 58,500                                                             | -                                                                |
| <b>Czech Rep.</b> | 21,709                                                             | 1,475.92                                                         |
| <b>Denmark</b>    | 59,576                                                             | 5,800.15                                                         |
| <b>Dubai</b>      | 59,436                                                             | -                                                                |
| <b>Egypt</b>      | 2,449                                                              | 105.77                                                           |
| <b>Estonia</b>    | 23,498                                                             | 1,300.48                                                         |
| <b>Finland</b>    | 61,375                                                             | 4,205.74                                                         |
| <b>France</b>     | 43,664                                                             | 4,379.73                                                         |
| <b>Georgia</b>    | 5,876                                                              | 293.05                                                           |
| <b>Germany</b>    | 52,957                                                             | 5,033.45                                                         |
| <b>Greece</b>     | 22,095                                                             | 1,516.59                                                         |
| <b>Hong Kong</b>  | 14,820                                                             | -                                                                |
| <b>Hungary</b>    | 12,363                                                             | 981.42                                                           |
| <b>Iceland</b>    | 73,320                                                             | 6,086.31                                                         |
| <b>India</b>      | 2,444                                                              | 69.29                                                            |
| <b>Indonesia</b>  | 10,140                                                             | 114.97                                                           |
| <b>Iran</b>       | 10,920                                                             | 475.48                                                           |

|                     |        |          |
|---------------------|--------|----------|
| <b>Ireland</b>      | 60,498 | 4,976.86 |
| <b>Israel</b>       | 56,174 | 3,144.63 |
| <b>Italy</b>        | 28,981 | 2,840.13 |
| <b>Japan</b>        | 36,254 | 4,168.99 |
| <b>Jordan</b>       | 15,860 | 340.66   |
| <b>Kosovo</b>       | 13,152 | -        |
| <b>Latvia</b>       | 16,834 | 930.35   |
| <b>Lebanon</b>      | 20,280 | 719.44   |
| <b>Lithuania</b>    | 19,735 | 1,078.18 |
| <b>Macedonia</b>    | 16,133 | 328.42   |
| <b>Malaysia</b>     | 9,360  | 384.07   |
| <b>Mexico</b>       | 9,672  | 494.68   |
| <b>Montenegro</b>   | 45,592 | -        |
| <b>Morocco</b>      | 6,812  | 161.01   |
| <b>Netherlands</b>  | 89,958 | 4,911.44 |
| <b>New Zealand</b>  | 26,479 | 3,937.22 |
| <b>Norway</b>       | 64,959 | 7,936.38 |
| <b>Panama</b>       | 20,721 | 1,112.30 |
| <b>Paraguay</b>     | 14,040 | 381.11   |
| <b>Peru</b>         | 12,480 | 332.57   |
| <b>Philippines</b>  | 4,710  | 132.90   |
| <b>Poland</b>       | 16,899 | 906.82   |
| <b>Portugal</b>     | 27,472 | 1,908.03 |
| <b>PR China</b>     | 8,885  | 440.83   |
| <b>Romania</b>      | 20,692 | 555.10   |
| <b>Russian Fed</b>  | 14,882 | 585.87   |
| <b>Saudi Arabia</b> | 31,200 | 1,093.41 |
| <b>Senegal</b>      | 10,693 | 55.01    |
| <b>Serbia</b>       | 9,645  | 528.55   |
| <b>Singapore</b>    | 24,604 | 2,618.71 |
| <b>Slovak Rep.</b>  | 21,744 | 1,186.14 |
| <b>Slovenia</b>     | 38,578 | 1,920.28 |
| <b>South Africa</b> | 13,712 | 499.24   |
| <b>South Korea</b>  | 19,812 | 2,283.07 |
| <b>Spain</b>        | 24,374 | 2,506.46 |
| <b>St Maarten</b>   | 67,904 | -        |
| <b>Sweden</b>       | 72,858 | 5,904.58 |
| <b>Switzerland</b>  | 85,132 | 9,956.26 |
| <b>Thailand</b>     | 7,020  | 247.04   |
| <b>Tunisia</b>      | 5,980  | 250.56   |
| <b>Turkey</b>       | 9,100  | 444.65   |
| <b>UK</b>           | 30,152 | 3,858.67 |
| <b>Uruguay</b>      | 23,400 | 1,591.53 |

**Supplemental Figure 1.** Dialysis Costs and Healthcare Expenditures

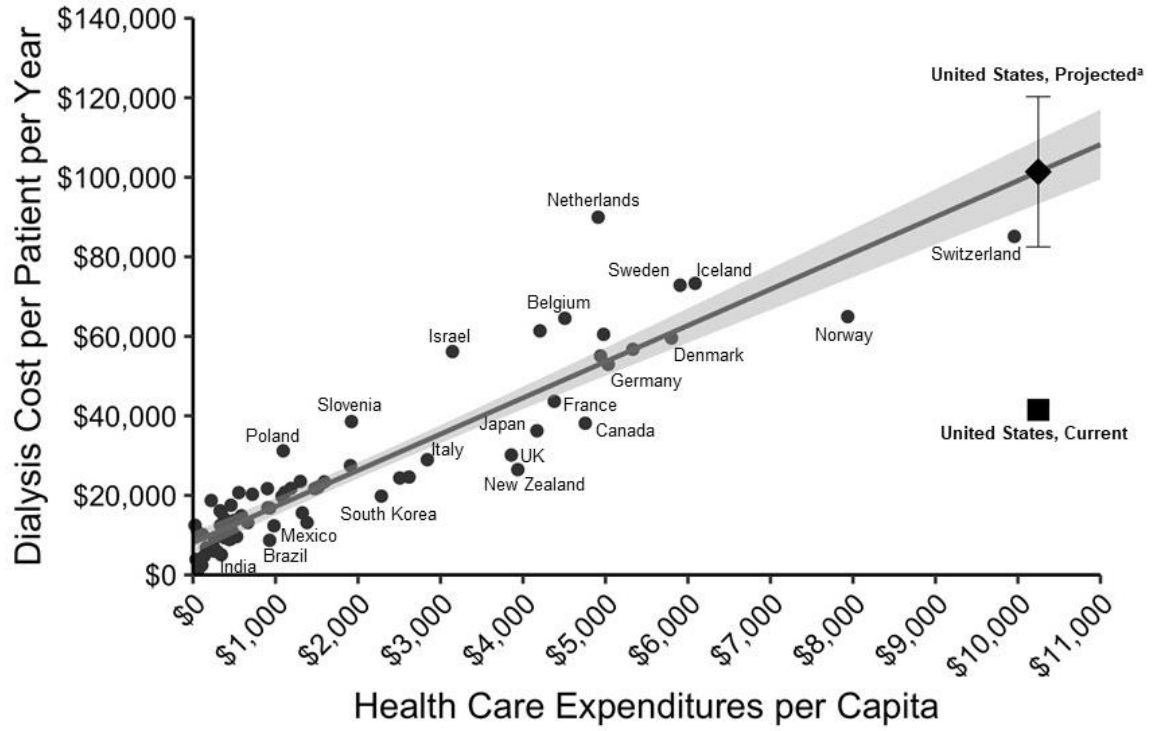

<sup>a</sup> Shaded area represents 95% confidence interval. Error bar represents 95% prediction interval of U.S. cost of dialysis per patient per year.

**Supplemental Figure 2.** Linear regression of dialysis costs and healthcare expenditures of 22 countries with healthcare expenditures per capita more than \$2000.

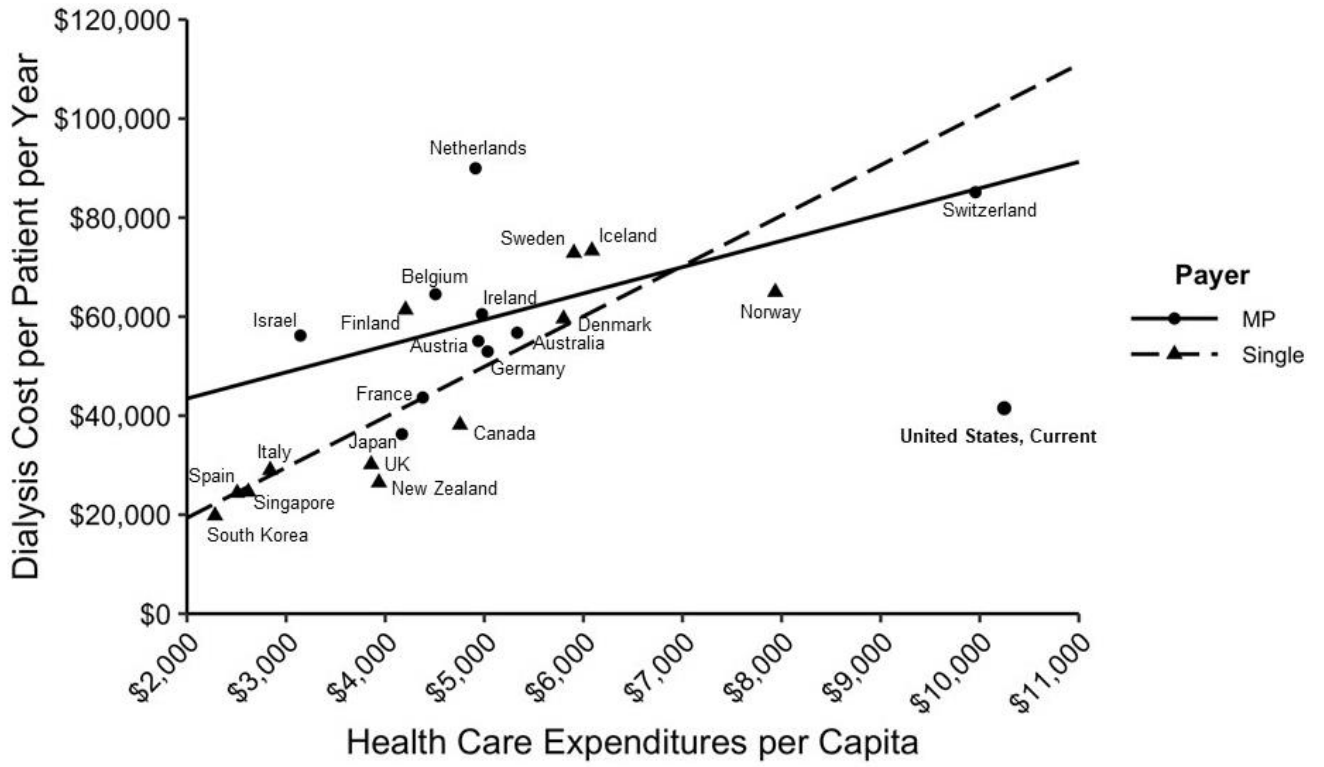

Supplement: ASN.2021010082SupplementaryData.pdf [file ASN.2021010082SupplementaryData.pdf]
